# Supplementary material for: Gold Nanoparticle-Based Microfluidics Chips for Capture and Detection of Circulating Tumor Cells
Source: Preprints.org preprint supplement (doi:10.20944/preprints202305.0442.v1), 2023-05-08
Supplement: Supplementary file 1 [file supplementary]

# Gold nanoparticle-based Microfluidics Chips for Capture and Detection of Circulating tumor cells

Valber A. Pedrosa<sup>1</sup>, Kangfu Chen<sup>2</sup>, Z. Hugh Fan<sup>2</sup>

<sup>1</sup> Institute of Bioscience of Botucatu, Sao Paulo State University – Unesp – Botucatu, Brazil; valber.pedrosa@unesp.br

<sup>2</sup> Interdisciplinary Microsystems Group, Department of Mechanical and Aerospace Engineering, University of Florida, P.O. Box 116250, Gainesville, FL 32611, USA.

\* Correspondence: valber.pedrosa@unesp.br;

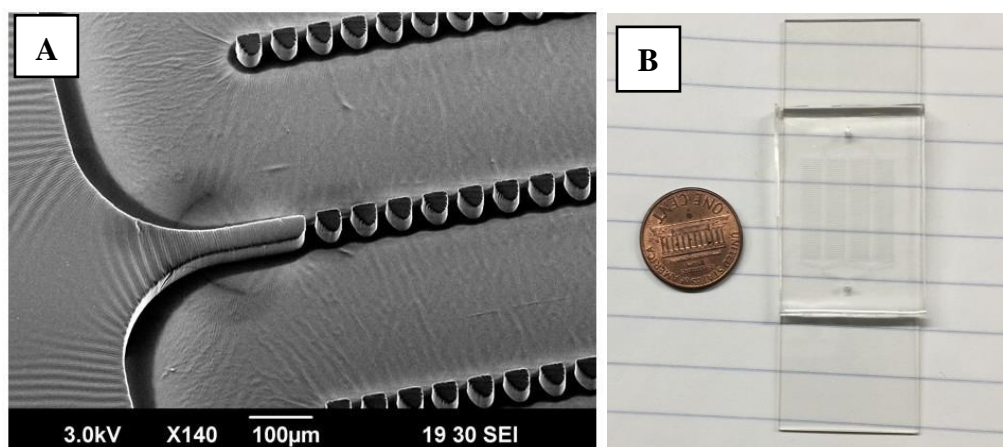

**Figure S1.** A) SEM image of the device. The image shows the main coil channel and the arrangement of side filters. B) Finished device.
